# Supplementary material for: Cognitive Function in Low-Income and Low-Literacy Settings: Validation of the Tablet-Based Oxford Cognitive Screen in the Health and Aging in Africa: A Longitudinal Study of an INDEPTH Community in South Africa (HAALSI)
Source: Oxford University Press journal article supplement (doi:10.1093/geronb/gbw139), 2016-10-11
Supplement: gbw139_suppl_Supplemental_Tables_1_2.docx [file gbw139_suppl_Supplemental_Tables_1_2.docx]

**Supplemental Table 1. OCS-Plus compliance and test conditions.**

| **Condition of test** | **Executive Trails (%)** | **Executive Rule Finding (%)** | **Attention (%)** |
| --- | --- | --- | --- |
| Assessed with no issues | 84.4 | 96.4 | 88.5 |
| Poor comprehension | 6.8 | 0.5 | 6.8 |
| No speech | 0.1 | 0 | 0.6 |
| Visual problems | 1.6 | 0.7 | 0.4 |
| Motor problems | 4.6 | 1.1 | 0.9 |
| Auditory problems | 0 | 0 | 0 |
| Fatigue | 0.2 | 0.4 | 0.6 |
| Refused | 0.3 | 0.3 | 0.2 |
| Technical problems | 0.4 | 0 | 1.1 |
| Ran out of time | 0.1 | 0 | 0 |
| Interruptions | 0.1 | 0.1 | 0.4 |
| Examiner error | 0.1 | 0 | 0.1 |
| Other | 1.4 | 0.5 | 0.4 |

**Supplemental Table 2. Summary of the OCS-Plus tasks, illustrations of visual displays and derived scores in the order in which they were administered to respondents.**

| **Task** | **Domain** | **Respondent display** | **Scores** |
| --- | --- | --- | --- |
| Picture Naming | Language | 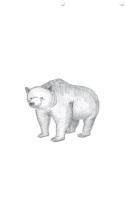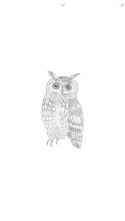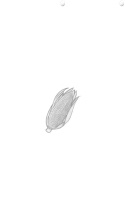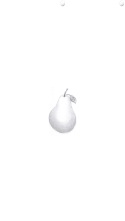 | 1 for each correct answer, maximum total of 4 |
| Semantics | Language | 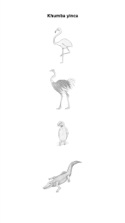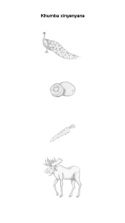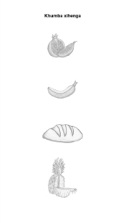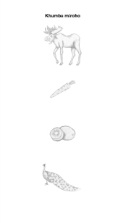 | 1 for each correct answer, maximum total of 4 |
| Orientation | Memory | No respondent display, questions were asked verbally by interviewer | 1 for each correct answer, maximum total of 4 |
| Word Encoding | Memory | 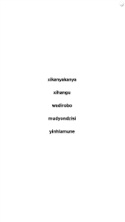Words were shown and read out loud twice.  Recall verbally prompted by interviewer. | 1 for each recalled word, maximum total of 5 for both first and second immediate recall |
| Trails | Executive Function | 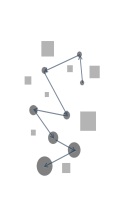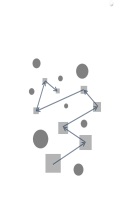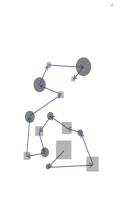 (Illustration of correct target trails) | 1 for each correct connection, maximum of 7 in each baseline condition; maximum of 14 in switch condition. Executive score was calculated as % of score in switch condition out of highest score in baseline conditions. |
| Word Delayed Recall | Memory | No respondent display | 1 for each recalled word, maximum total of 5 |
| Incidental Memory | Memory | 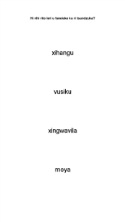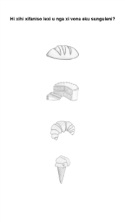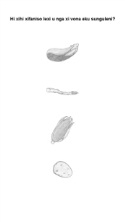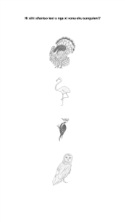 | 1 for each correct answer, maximum total of 4 |
| Rule  Finding | Executive Function | 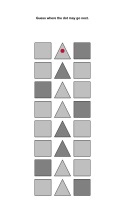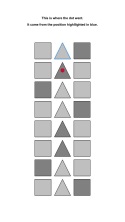 | 2 consecutive correctly predicted moves within a rule were scored as ‘rule found’, maximum total of 5 |
| Auditory Attention | Selective Attention | 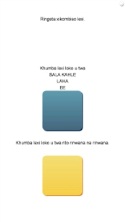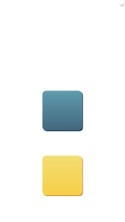 | 1 for each correctly identified test word, maximum total of 27 |
